# Supplementary material
Source: PubMed Central journal article supplement (PMC7835103)
Supplement: mmc1.pdf [file mmc1.pdf]

**Cell Reports, Volume 34**

## **Supplemental Information**

### **Cross-reactivity of SARS-CoV structural protein antibodies against SARS-CoV-2**

**Timothy A. Bates, Jules B. Weinstein, Scotland Farley, Hans C. Leier, William B. Messer, and Fikadu G. Tefesse**



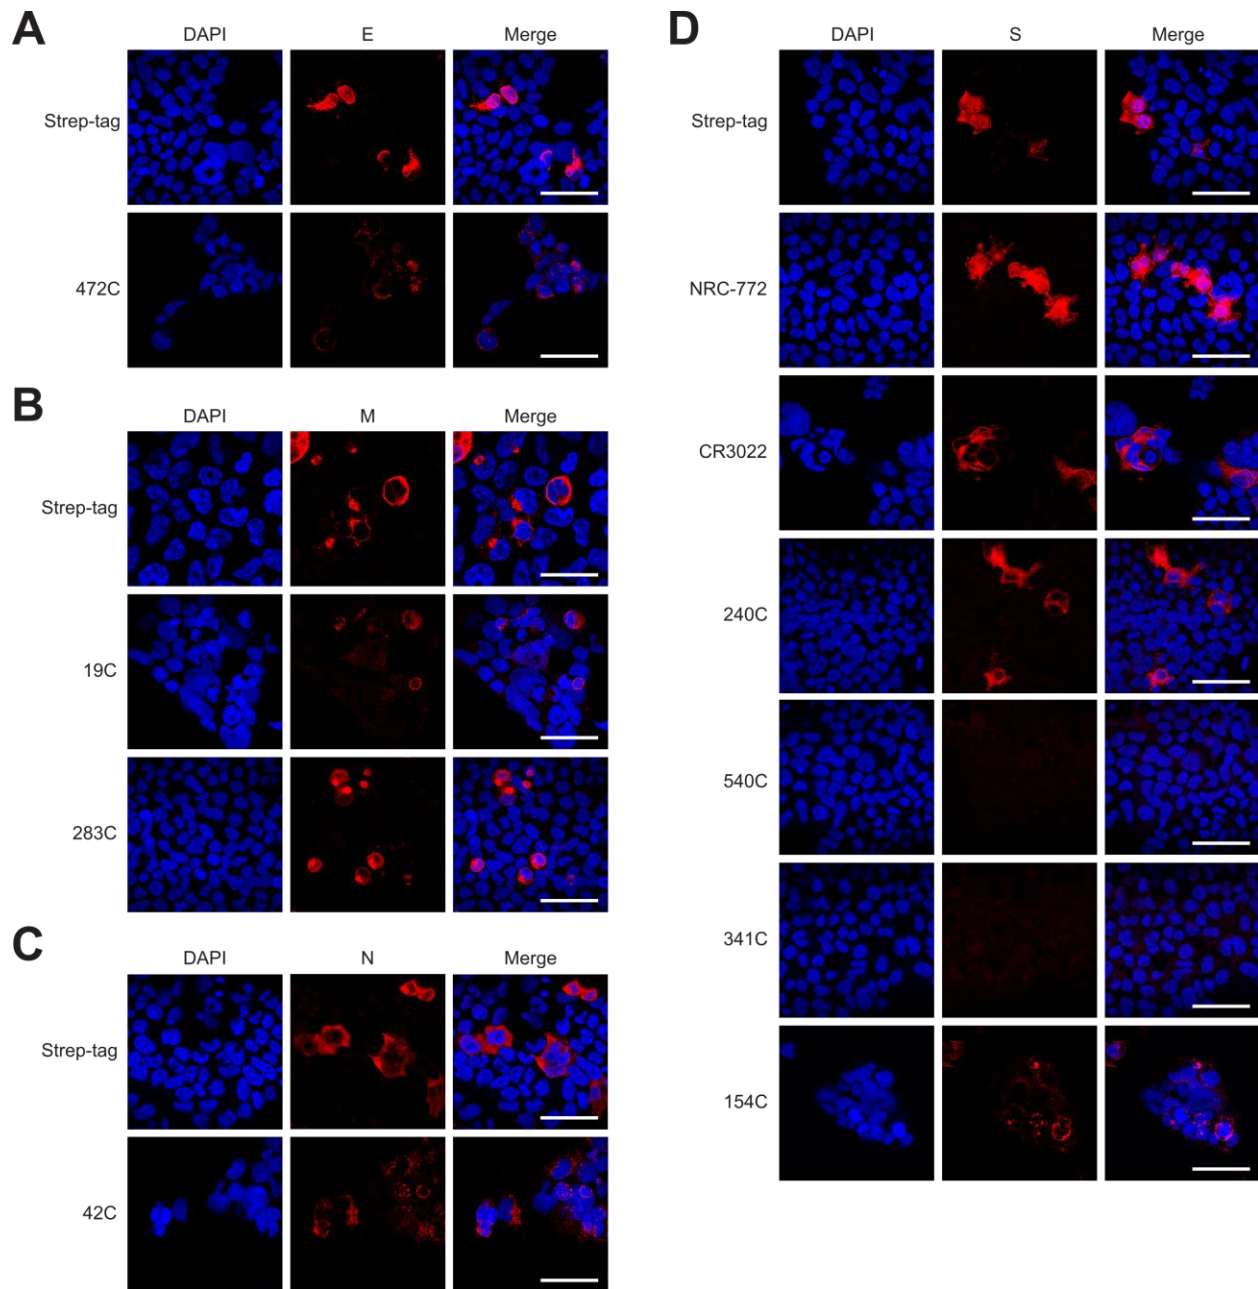

**Figure S2: Immunofluorescence of SARS-CoV-2 structural proteins using SARS-CoV antibodies.** Representative immuno-fluorescence images of HEK 293T cells transiently transfected with SARS-CoV-2 structural proteins. 24 h post-transfection, cells were fixed and stained with the listed SARS-CoV antibodies: (A) Envelope, (B) Membrane, (C) Nucleocapsid, and (D) Spike proteins. All proteins are strep-tagged and control stained with anti-strep-tag antibody or the indicated antigen-specific antibody (Red). Scale bars 50  $\mu$ m. DAPI (Blue) was used to visualize cell nuclei. Related to Figure 2.

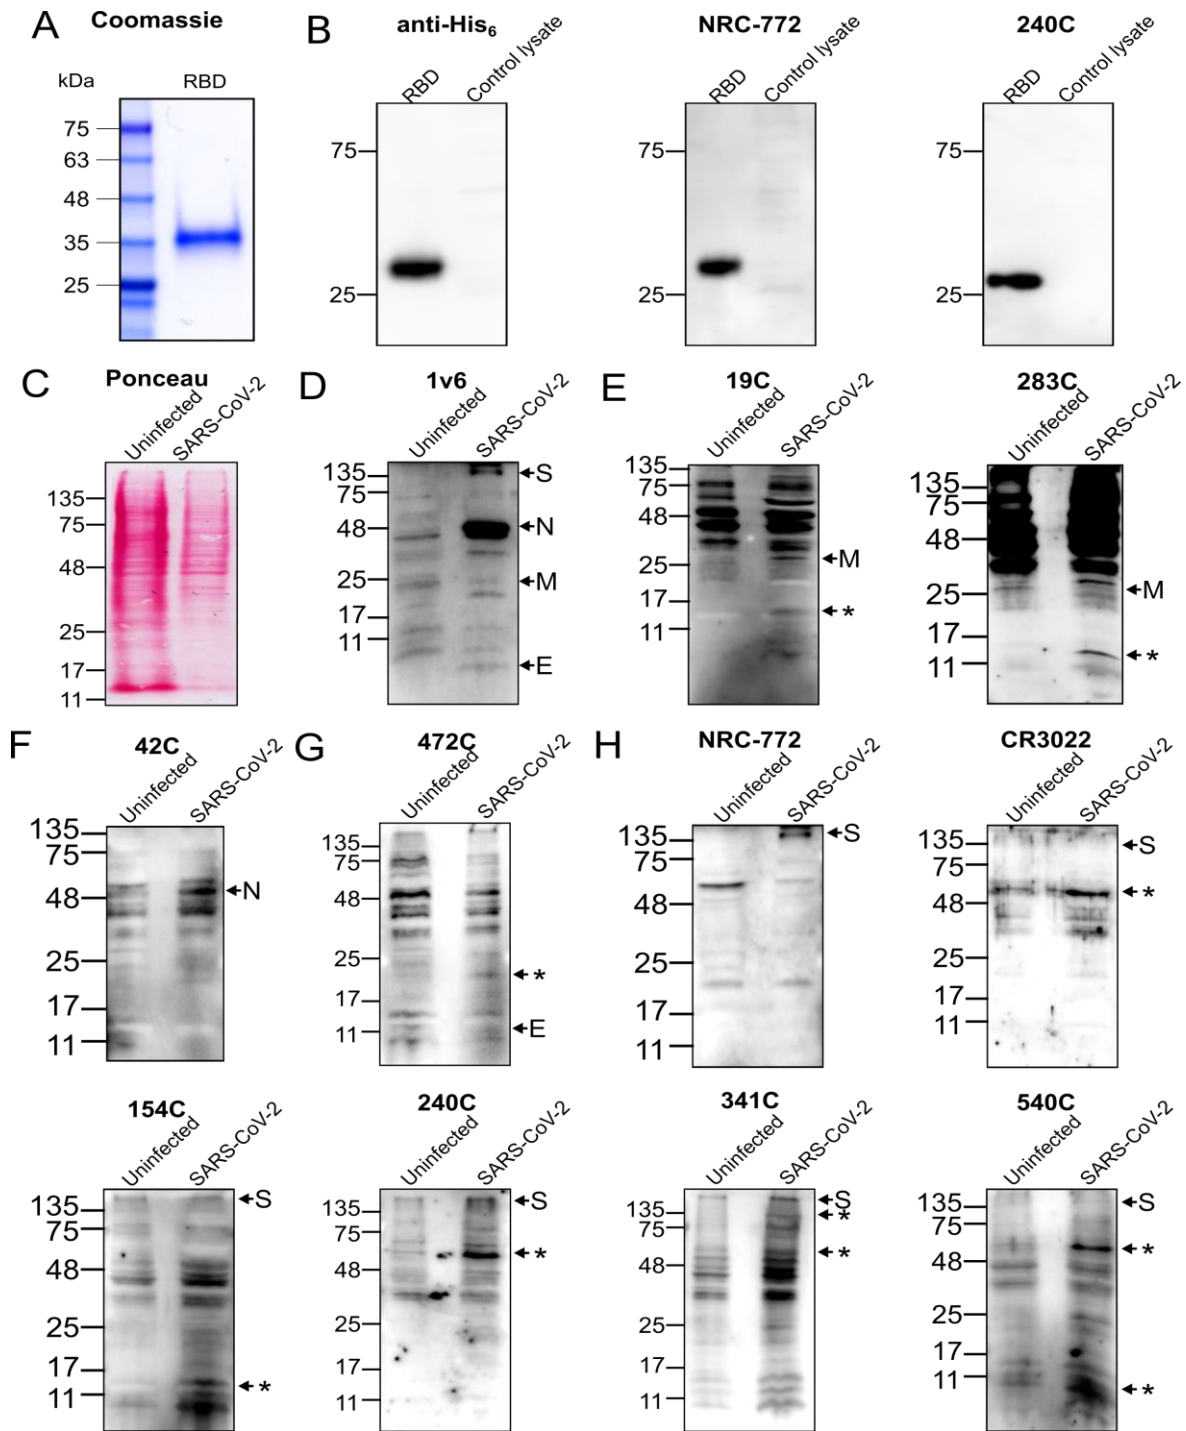

**Figure S3: SARS-CoV structural proteins show cross-reactivities with SARS-CoV-2 by immunoblotting.** (A) Coomassie stain of purified RBD used in B. (B) purified SARS-CoV-2 spike RBD protein and control wild-type HEK 293T lysate probed with anti-S monoclonal antibodies. (C) Ponceau staining of SARS-CoV-2 infected and uninfected Vero E6 cell lysate. Western blots with SARS-CoV-2 lysates stained with (D) convalescent human serum (E) anti-M (F) anti-N (G) anti-E and (H) anti-S SARS-CoV monoclonal antibodies. Arrows indicate expected molecular weight and \* indicates expected alternate bands based on western blot results from previous reports (Gordon et al., 2020). Shown are representative images of 2 to 3 independent experiments. Related to Figure 3.

**A**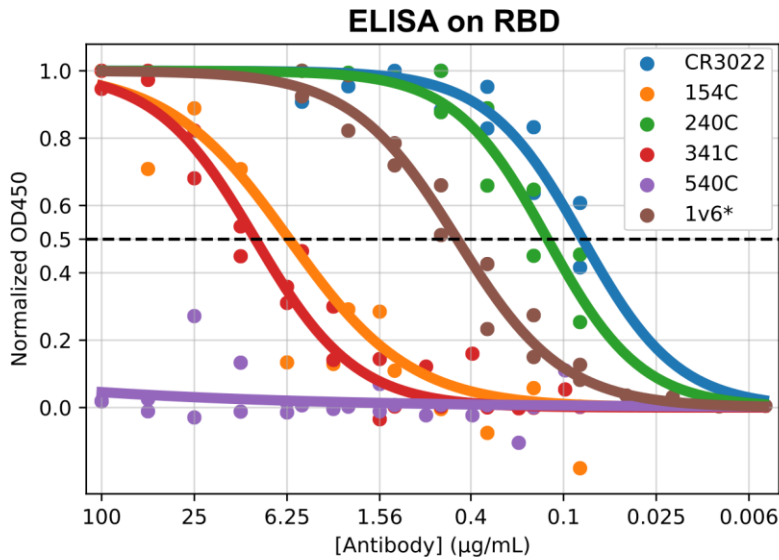**B**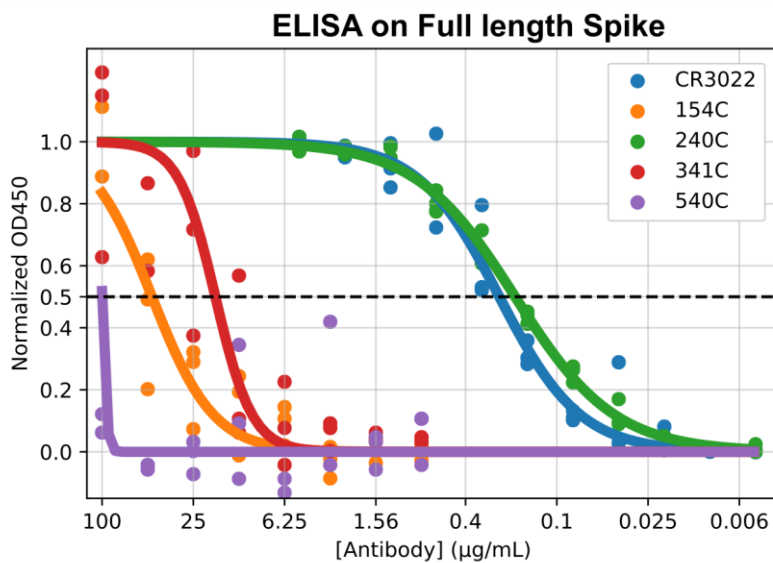**Figure S4: SARS-CoV Spike monoclonal antibodies show cross-reactivity by ELISA**

**(extended data).** ELISA against (A) RBD coated at 2  $\mu\text{g/mL}$  and (B) full length spike coated at 2  $\mu\text{g/mL}$  and then probed with the indicated monoclonal antibody, or 1v6 human convalescent serum. Each point represents the mean of 3 technical replicates from a single experiment (2 technical replicates for 1v6, CR3022, 154C, and 240C on RBD); data from 3 independent experiments is shown ( $n=3$ ). Data were normalized according to the maximum signal seen for each secondary antibody in each experiment. \*1v6 is convalescent serum used to validate the assay. A stock concentration of 1  $\text{mg/mL}$  was used to facilitate calculations for reference purposes, but this does not represent an accurate  $\text{EC}_{50}$  value. Related to Figure 3.

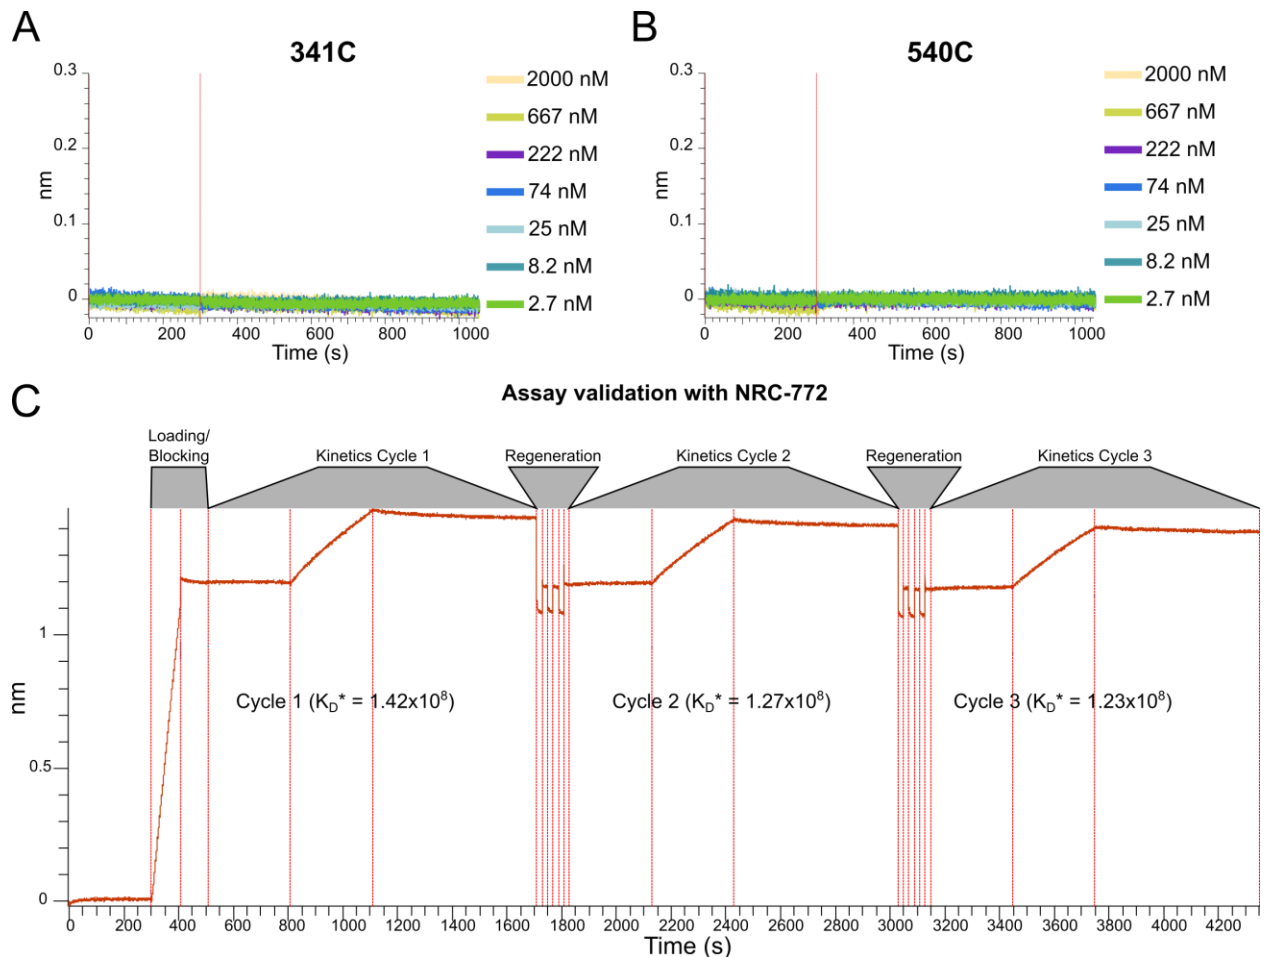

**Figure S5: Binding Kinetics of Spike specific antibodies against the RBD of the SARS-CoV-2 (BLI extended data).** Negative binding curves for antibodies (A) 341C and (B) 540C. (C) NRC-772 rabbit polyclonal antibody used for method validation. Curves show minimal loss of signal with multiple regeneration cycles as well as stable  $K_D$  values, demonstrating stability of RBD under regeneration conditions (3x cycles of 20 seconds in 10mM Glycine pH 1.7). NRC-772 serum used at 1:50 dilution in kinetics buffer.  $*K_D$  values assume 1 mg/mL initial concentration in order to facilitate  $K_D$  calculation only as a reference between cycles and does not represent an accurate affinity measurement. Related to Figure 4.

**A**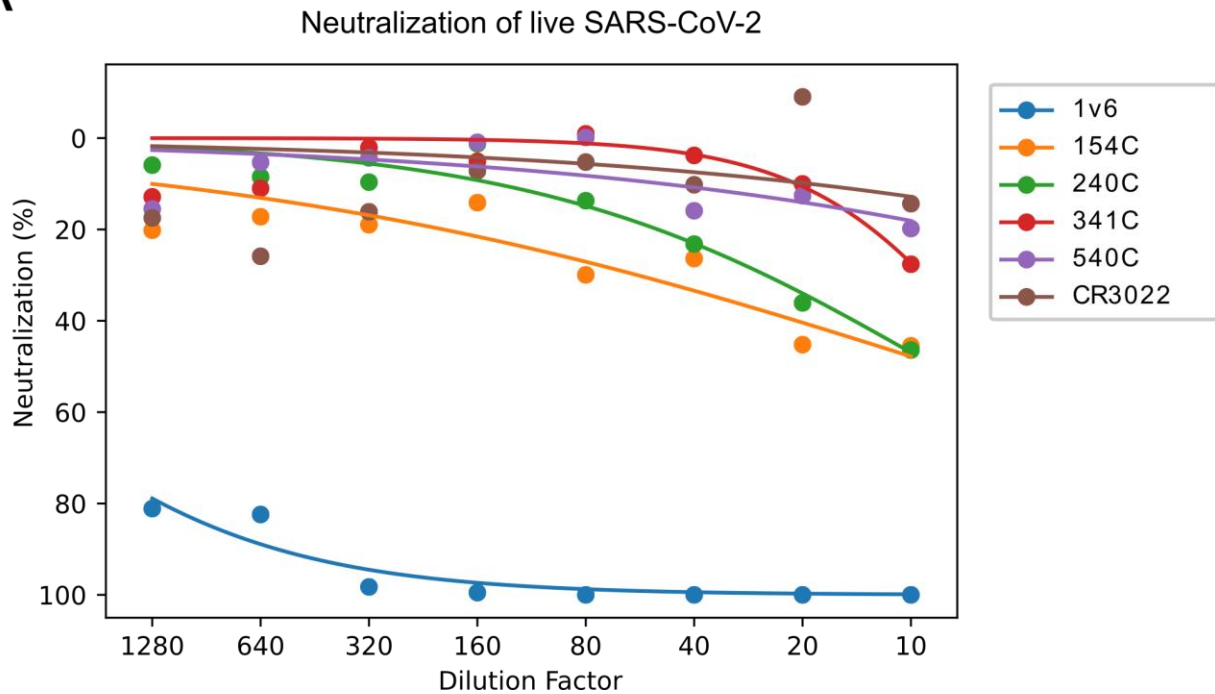

**Figure S6: Live SARS-CoV-2 neutralization by focus assay (extended data).** (A) Vero E6 cells were infected with approximately 30 pfu/well of live SARS-CoV-2 which was pre-incubated for 1 hour with the indicated final dilutions of antibodies before the addition of overlay media and 48 hours of incubation. Each point represents the average of three biological replicates (n=3), each in technical triplicate. Monoclonal antibodies 154C, 240C, 341C, 540C, and CR3022 stock concentrations were 1 mg/mL. Related to figure 4.
